# Supplementary material
Source: publisher site journal article supplement (https://www.dovepress.com/article/598045)
Supplement: Supplementary file 1 [file 598045%20Supplementary%20Material.docx]

Table S1 Factor Loadings

|  | Factor 1 | Factor 2 | Factor 3 | Uniqueness |
| --- | --- | --- | --- | --- |
| F28 | 0.869 | -0.478 |  | 0.327 |
| F11 | 0.832 |  |  | 0.423 |
| F7 | 0.742 |  |  | 0.461 |
| F8 | -0.741 |  |  | 0.534 |
| F37 | 0.596 |  |  | 0.458 |
| F32 | 0.571 |  |  | 0.709 |
| F10 | 0.537 |  |  | 0.734 |
| F36 | 0.509 |  |  | 0.587 |
| F29 | 0.456 | 0.427 |  | 0.600 |
| F23 |  | 0.732 |  | 0.591 |
| F17 |  | 0.672 |  | 0.541 |
| F16 |  | 0.642 |  | 0.559 |
| F19 |  | 0.603 |  | 0.683 |
| F15 |  | 0.580 |  | 0.638 |
| F18 |  | 0.568 |  | 0.462 |
| F1 |  | 0.550 |  | 0.798 |
| F21 |  | 0.474 |  | 0.592 |
| F30 |  | 0.428 |  | 0.672 |
| F31 |  | 0.405 |  | 0.653 |
| F9 |  |  | 0.854 | 0.472 |
| F34 |  |  | 0.675 | 0.570 |
| F2 |  |  | 0.607 | 0.696 |
| F33 |  |  | 0.548 | 0.642 |
| F20 |  |  | 0.543 | 0.738 |
| F22 |  |  | 0.408 | 0.628 |
| F13 |  |  | 0.401 | 0.732 |
| F12 |  |  |  | 0.782 |
| F14 |  |  |  | 0.553 |
| F24 |  |  |  | 0.700 |
| F26 |  |  |  | 0.444 |
| F27 |  |  |  | 0.578 |
| F3 |  |  |  | 0.799 |
| F35 |  |  |  | 0.614 |
| F4 |  |  |  | 0.733 |
| F6 |  |  |  | 0.739 |
| F25 |  |  |  | 0.809 |
| F5 |  |  |  | 0.848 |
| Note: The factor loadings below 0.40 are not shown. Item 8 was reverse-scored. | | | | |

Table S2 The items and content of each factor in revised 25-item version

| Factors | Items |
| --- | --- |
| *Contextual Adaptability* | 7*: I am open to new experiences and trying new things.  10*: I can easily change my approach to a task if shown a better way.  11*: I have a broad range of interests.  28*: I can easily adapt to changes in the topic of conversation.  32*: I can adapt my behavior according to the social situation (e.g., casual versus formal settings).  36: I have trouble shifting my attention from one thing to another.  37: I have trouble thinking outside the box or coming up with solutions to problems. |
| *Cognitive-behavioral rigidity* | 1: I insist on following my specific beliefs and values.  15: I have to be right, even if it means not listening to others’ opinions.  16: I expect others to uphold the same ideas, values, and beliefs as mine.  17: I need to repeat some actions/tasks until they feel “just right”.  18: I find it hard to let go of my ideas or beliefs, even when presented with new information.  19: I feel like I need to repeat certain actions (e.g., pacing, tapping, checking).  21: I get overly focused on small details even when it’s not helpful to do so.  23: I ruminate or brood over the same matters or thoughts.  30: I have specific interests in items or objects that others find unusual.  31: I tend to think in black and white terms (e.g., ‘all-or-nothing’, ‘good or bad’). |
| *Routine/Control* | 2: I insist on eating the same foods or at the same time every day.  8*: I tend to have very strong interests, which I insist on pursuing.  9: I have specific routines related to my meals/food (e.g. needing to sit in the same spot, use the same cutlery).  13: I struggle to get rid of my belongings, even when they have no use (e.g., an old newspaper).  20: I need to keep objects in my home in a specific place (e.g., ornaments, tools, utensils, appliances).  22: I am interested in some object(s) because of their visual properties (e.g., color, shape, texture).  33: I prefer to wear the same type of clothes or outfits every day.  34: I insist on doing certain things at a specific time every day, regardless of the situation or context. |
| Note: *reverse-scored item. | |

Table S3 Assigned factor and posterior probability

| Item | Assigned factor | Posterior prob |
| --- | --- | --- |
| F1 | 1 | 0.787 |
| F2 | 3 | 0.782 |
| F3 | 3 | 0.686 |
| F4 | 3 | 0.862 |
| F5 | 3 | 0.508 |
| F6 | 3 | 0.829 |
| F7 | 2 | 0.997 |
| F8 | 1 | 0.836 |
| F9 | 3 | 0.762 |
| F10 | 2 | 0.974 |
| F11 | 2 | 1.000 |
| F12 | 3 | 0.698 |
| F13 | 3 | 0.624 |
| F14 | 3 | 0.845 |
| F15 | 3 | 0.535 |
| F16 | 3 | 0.683 |
| F17 | 1 | 0.839 |
| F18 | 3 | 0.730 |
| F19 | 1 | 0.837 |
| F20 | 3 | 0.549 |
| F21 | 3 | 0.717 |
| F22 | 3 | 0.528 |
| F23 | 1 | 0.829 |
| F24 | 3 | 0.758 |
| F25 | 3 | 0.745 |
| F26 | 3 | 0.865 |
| F27 | 3 | 0.866 |
| F28 | 2 | 1.000 |
| F29 | 2 | 0.771 |
| F30 | 1 | 0.666 |
| F31 | 2 | 0.506 |
| F32 | 2 | 0.993 |
| F33 | 3 | 0.847 |
| F34 | 3 | 0.825 |
| F35 | 3 | 0.862 |
| F36 | 2 | 0.922 |
| F37 | 2 | 0.931 |

Table S4 Posterior loadings of Bayesian exploratory factor analysis

| Item | Factor | Mean loading | SD | 95% HPD |
| --- | --- | --- | --- | --- |
| F1 | 1 | 0.778 | 0.158 | [0.498, 1.100] |
| F2 | 3 | 0.916 | 0.154 | [0.635, 1.277] |
| F3 | 3 | 0.773 | 0.134 | [0.535, 1.048] |
| F4 | 3 | 0.662 | 0.1115 | [0.446, 0.885] |
| F5 | 3 | 0.549 | 0.094 | [0.377, 0.735] |
| F6 | 3 | 0.759 | 0.129 | [0.521, 1.015] |
| F7 | 2 | 0.477 | 0.091 | [0.313, 0.668] |
| F8 | 1 | 1.284 | 0.225 | [0.876, 1.726] |
| F9 | 3 | 1.195 | 0.204 | [0.807, 1.598] |
| F10 | 2 | 0.627 | 0.112 | [0.425, 0.863] |
| F11 | 2 | 0.672 | 0.126 | [0.439, 0.929] |
| F12 | 3 | 0.723 | 0.120 | [0.501, 0.953] |
| F13 | 3 | 1.034 | 0.174 | [0.701, 1.366] |
| F14 | 3 | 0.780 | 0.131 | [0.549, 1.050] |
| F15 | 3 | 0.831 | 0.140 | [0.580, 1.112] |
| F16 | 3 | 0.817 | 0.138 | [0.567, 1.091] |
| F17 | 1 | 0.595 | 0.121 | [0.376, 0.836] |
| F18 | 3 | 0.672 | 0.115 | [0.465, 0.903] |
| F19 | 1 | 0.882 | 0.171 | [0.567, 1.214] |
| F20 | 3 | 1.082 | 0.184 | [0.739, 1.450] |
| F21 | 3 | 0.495 | 0.089 | [0.331, 0.672] |
| F22 | 3 | 0.760 | 0.136 | [0.514, 1.031] |
| F23 | 1 | 0.534 | 0.113 | [0.332, 0.769] |
| F24 | 3 | 1.099 | 0.183 | [0.763, 1.462] |
| F25 | 3 | 0.610 | 0.104 | [0.423, 0.821] |
| F26 | 3 | 0.379 | 0.069 | [0.255, 0.520] |
| F27 | 3 | 0.608 | 0.105 | [0.413, 0.814] |
| F28 | 2 | 0.500 | 0.093 | [0.329, 0.685] |
| F29 | 2 | 0.577 | 0.105 | [0.379, 0.778] |
| F30 | 1 | 0.850 | 0.149 | [0.578, 1.145] |
| F31 | 2 | 1.218 | 0.207 | [0.848, 1.633] |
| F32 | 2 | 0.529 | 0.093 | [0.369, 0.717] |
| F33 | 3 | 1.083 | 0.182 | [0.744, 1.439] |
| F34 | 3 | 0.805 | 0.137 | [0.561, 1.089] |
| F35 | 3 | 0.669 | 0.115 | [0.454, 0.892] |
| F36 | 2 | 0.467 | 0.086 | [0.311, 0.638] |
| F37 | 2 | 0.378 | 0.075 | [0.243, 0.531] |
